# Supplementary material for: Protein Stability of Pyruvate Kinase Isozyme M2 Is Mediated by HAUSP
Source: PubMed Central journal article supplement (PMC7352364; doi:10.3390/cancers12061548), 2020-06-12
Supplement: cancers-12-01548-s001.pdf [file cancers-12-01548-s001.pdf]

Supplementary Materials

# Protein Stability of Pyruvate Kinase Isozyme M2 Is Mediated by HAUSP

Hae-Seul Choi, Chang-Zhu Pei, Jun-Hyeok Park, Soo-Yeon Kim, Seung-Yeon Song, Gyeong-Jin Shin and Kwang-Hyun Baek

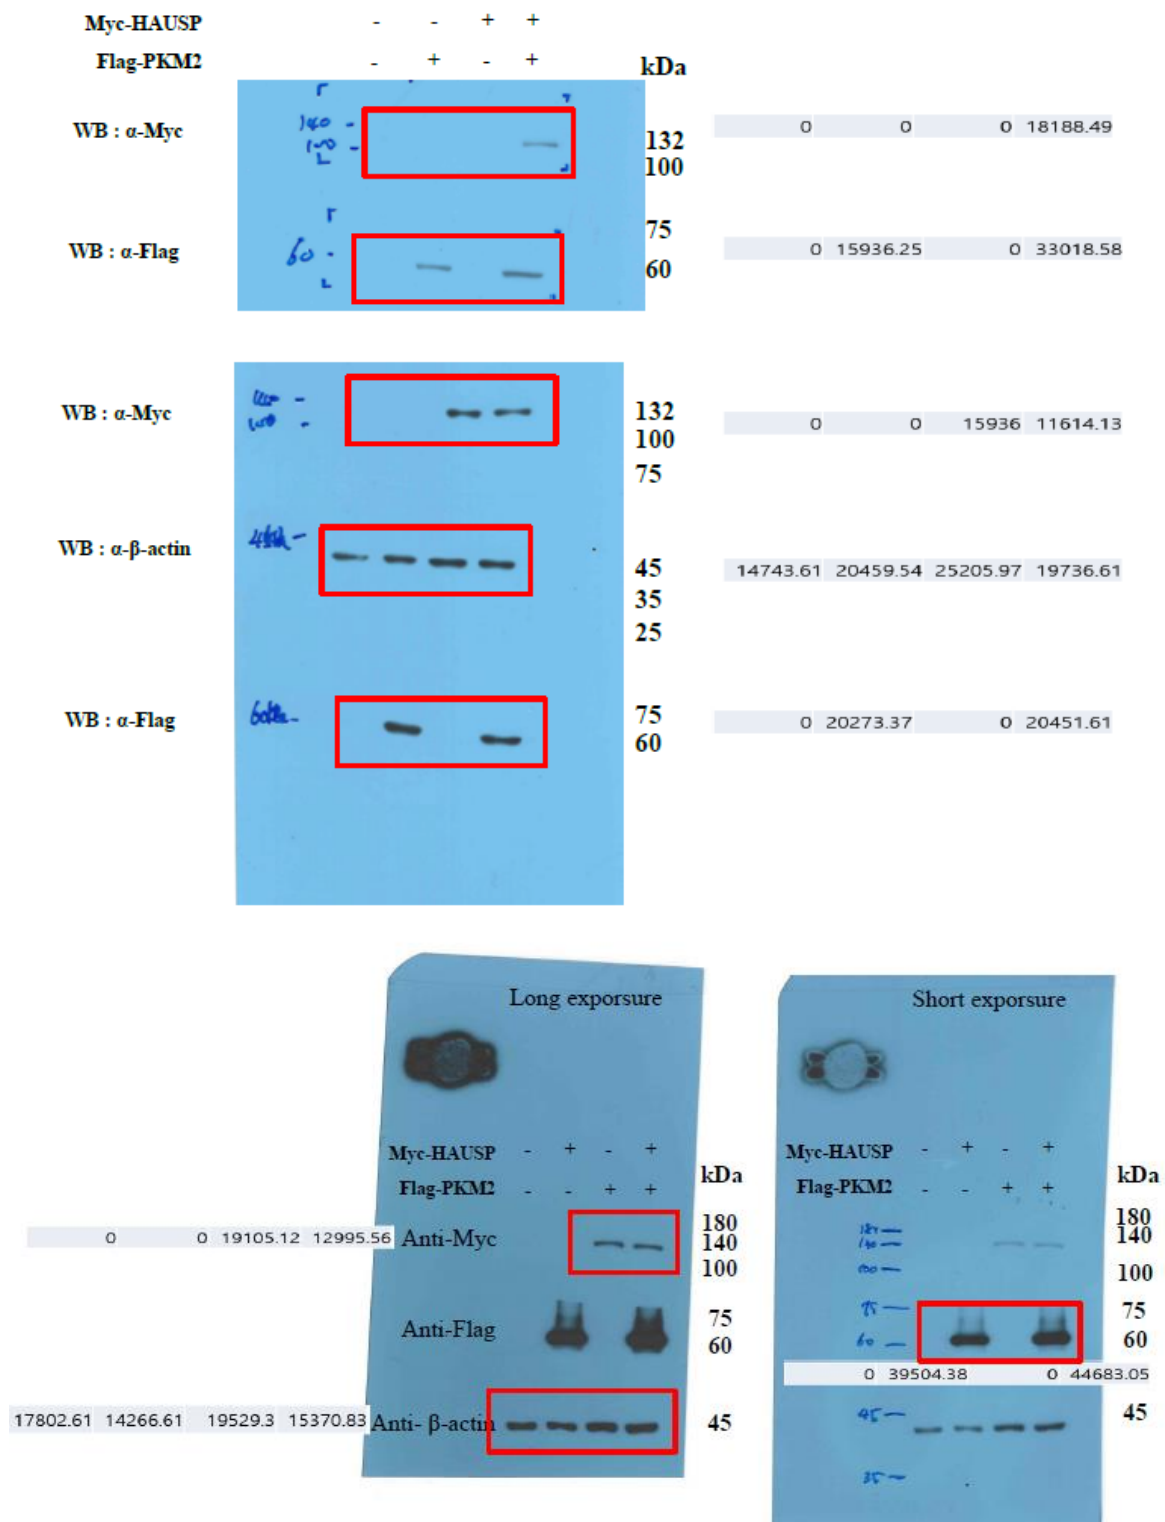

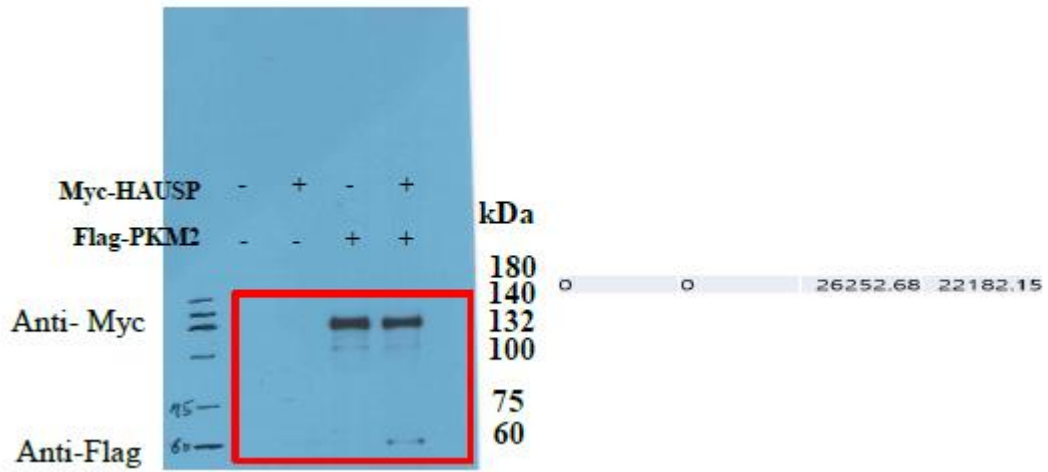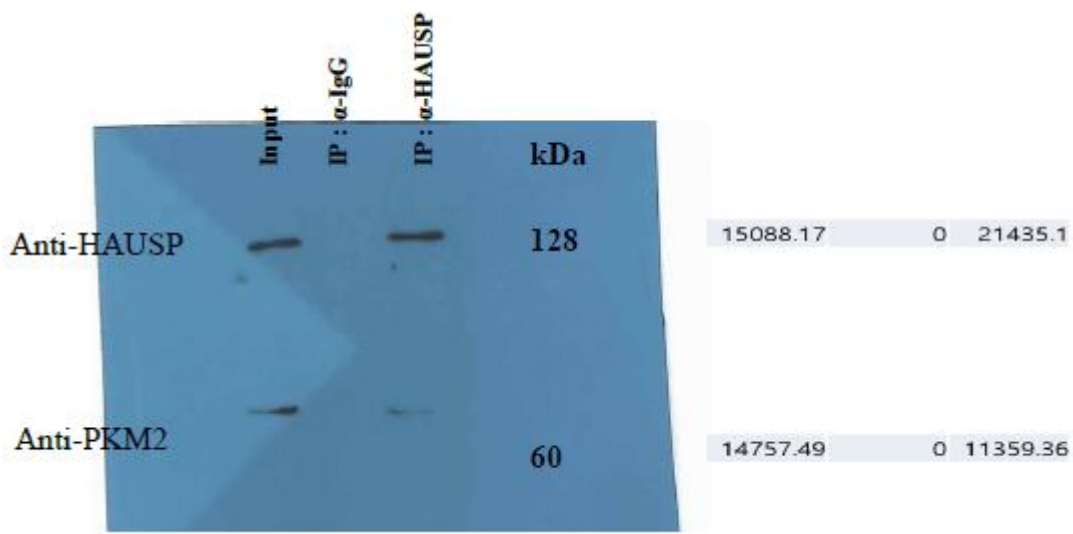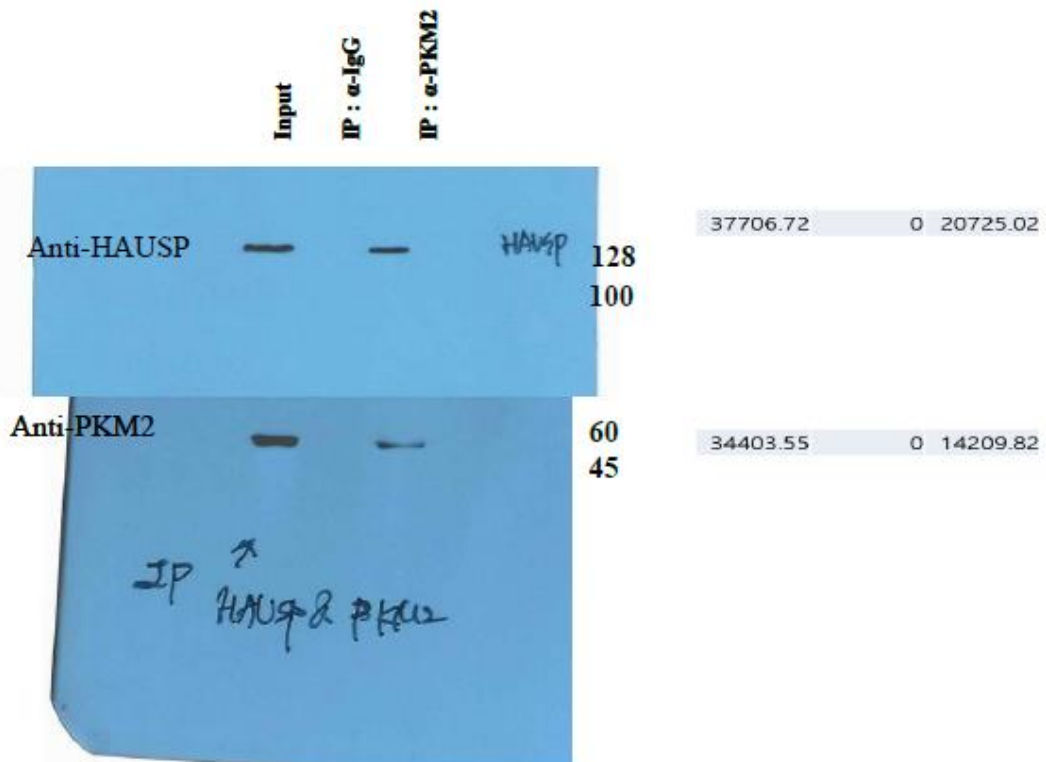

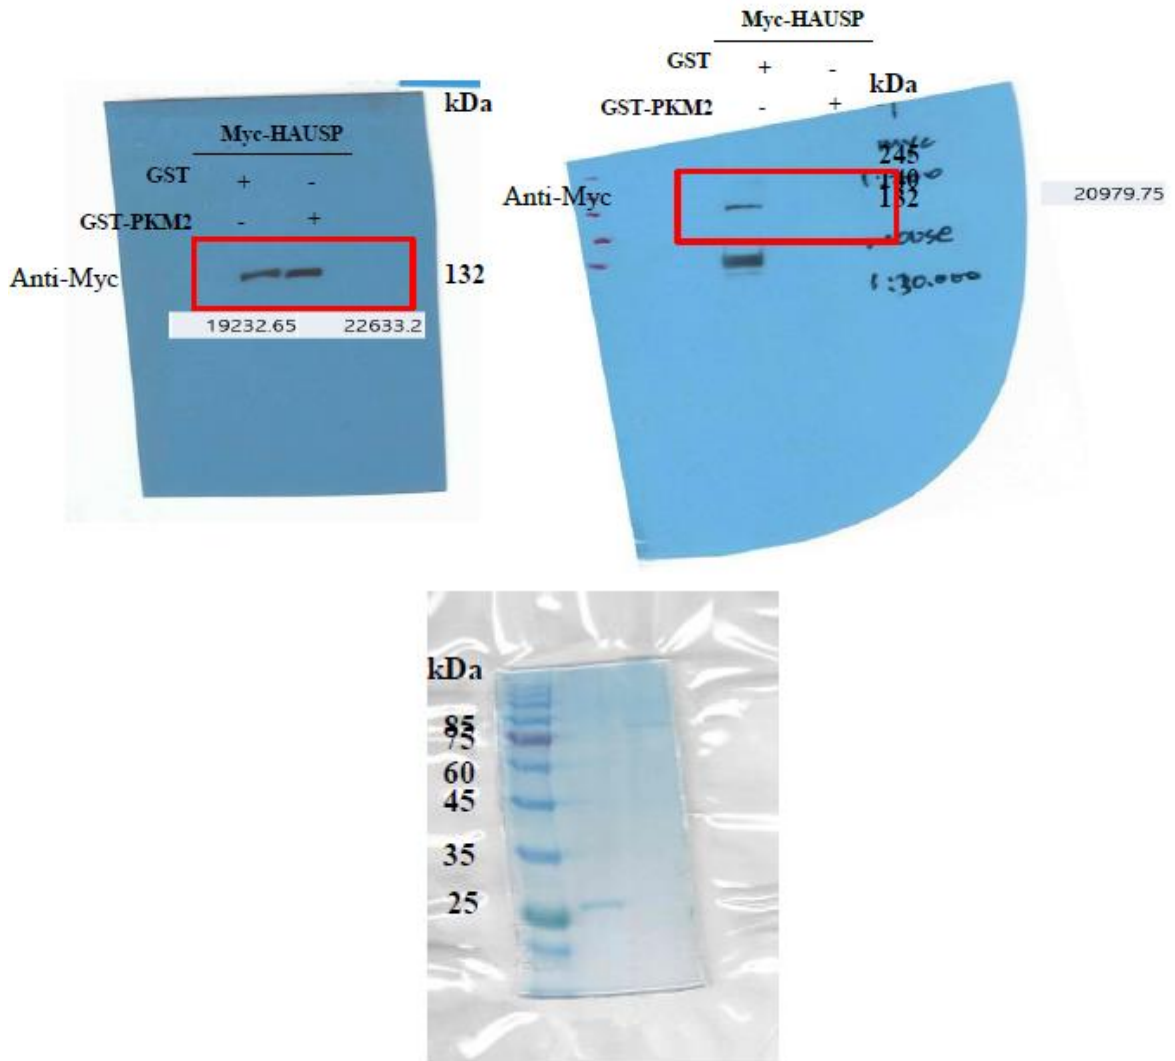

**Figure S1.** Detailed information about western blot in Figure 1.

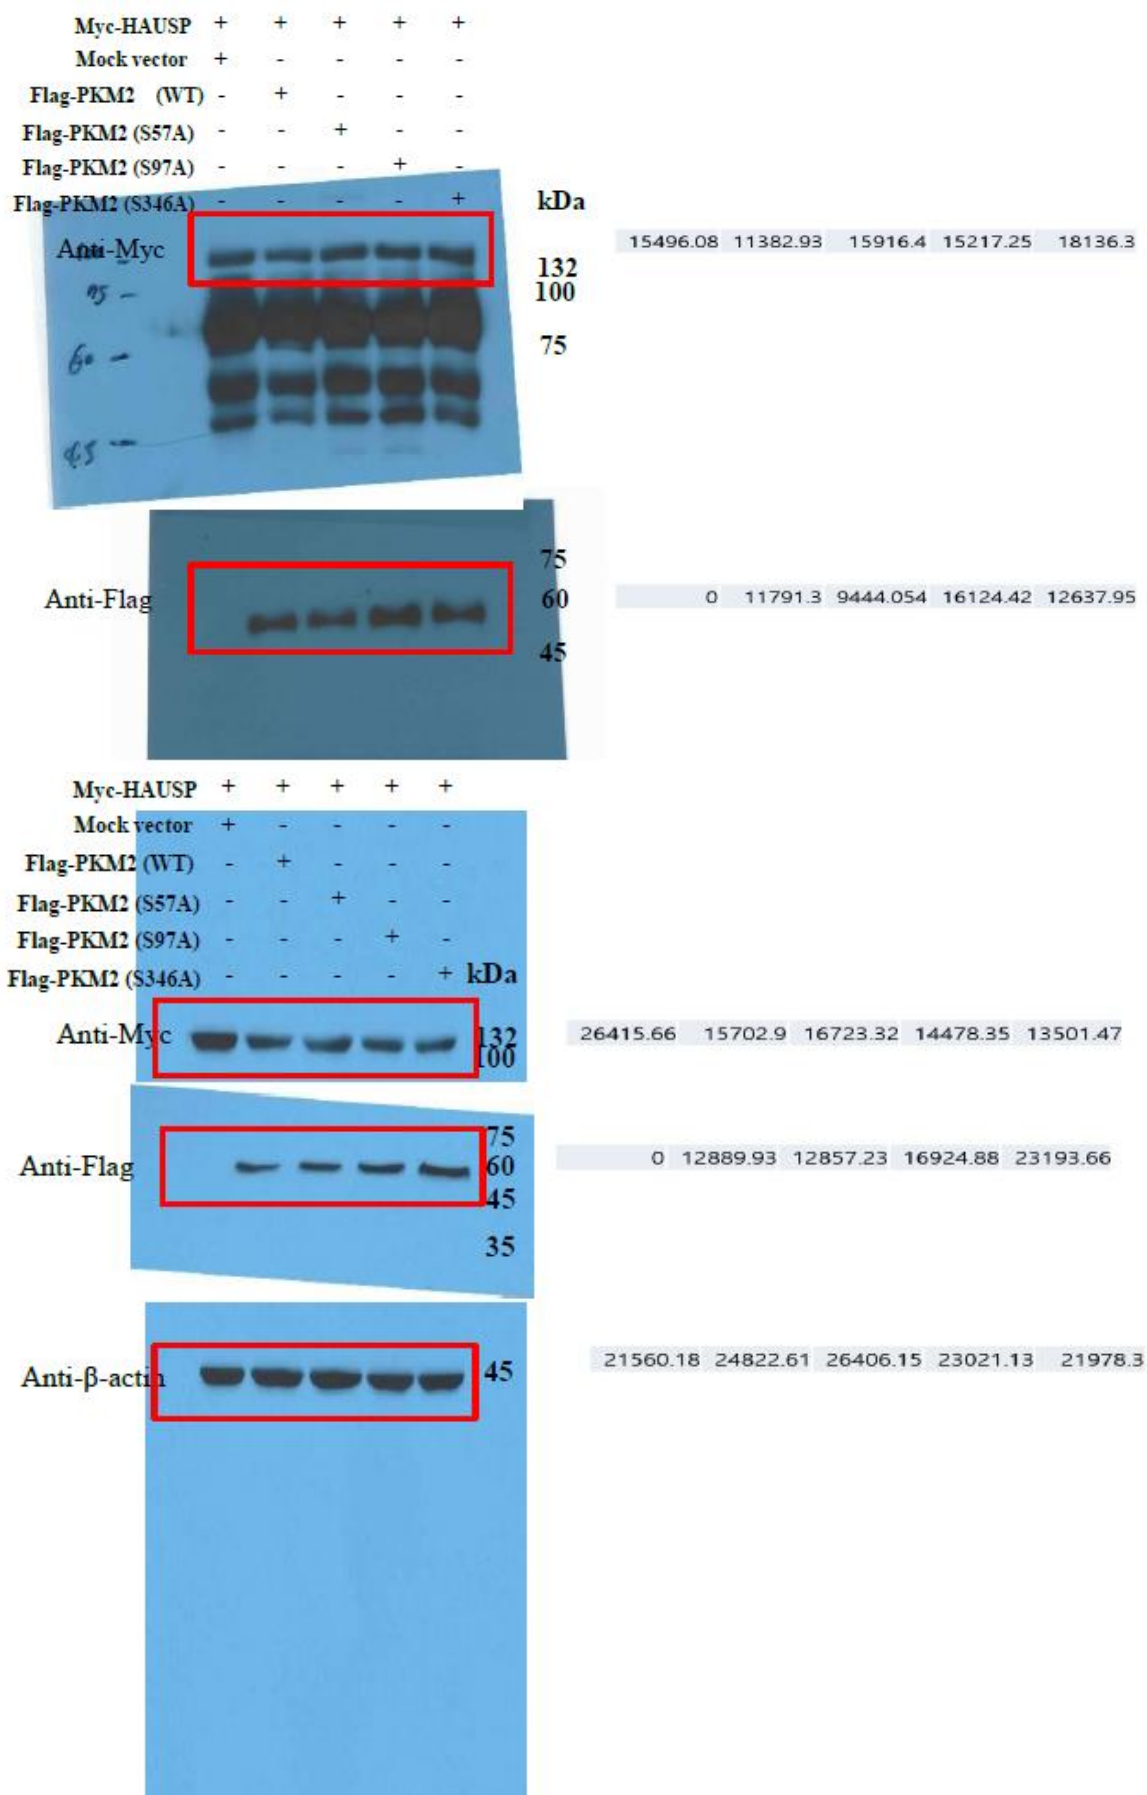

Figure S2. Detailed information about western blot in Figure 2.

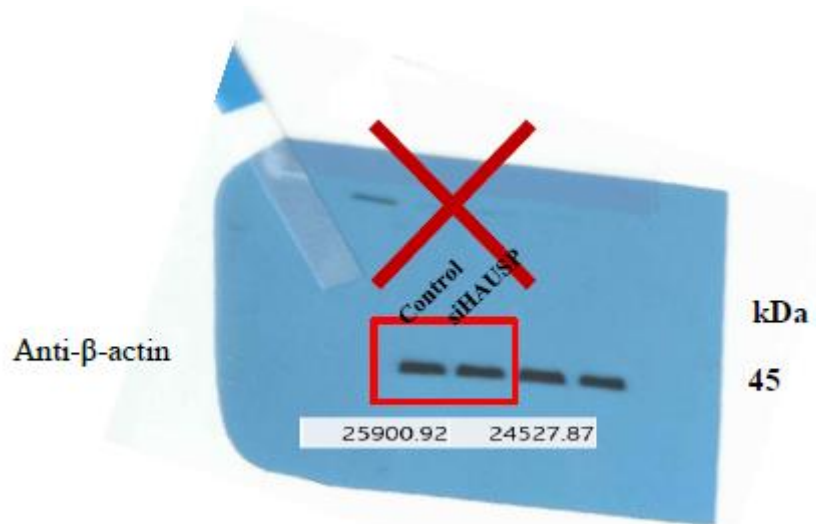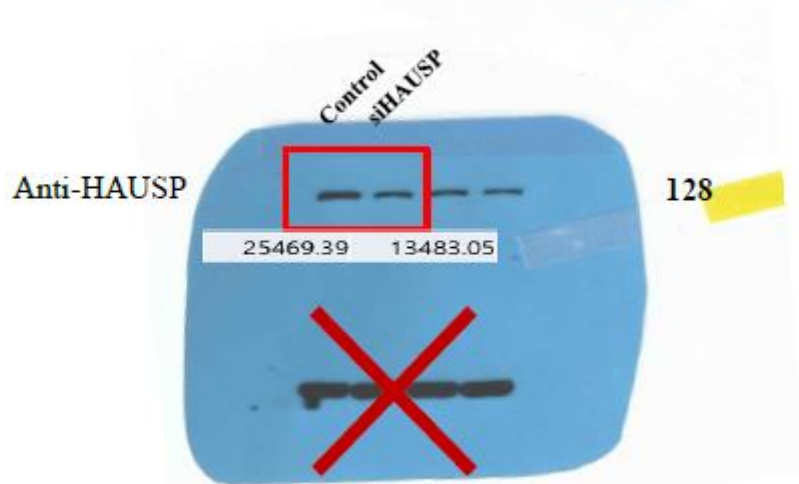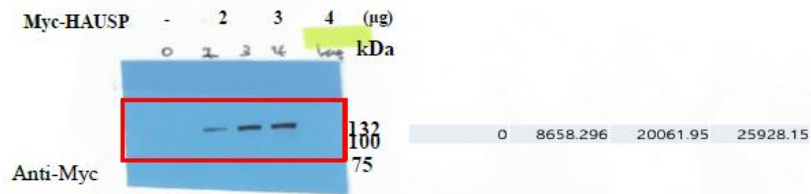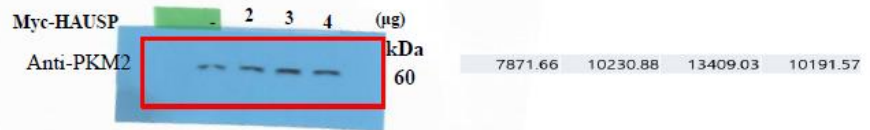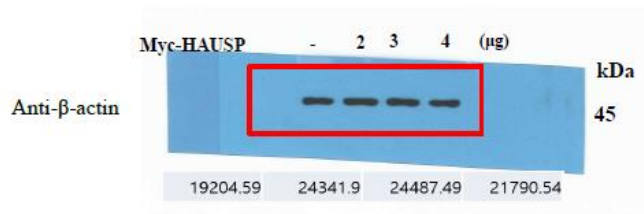

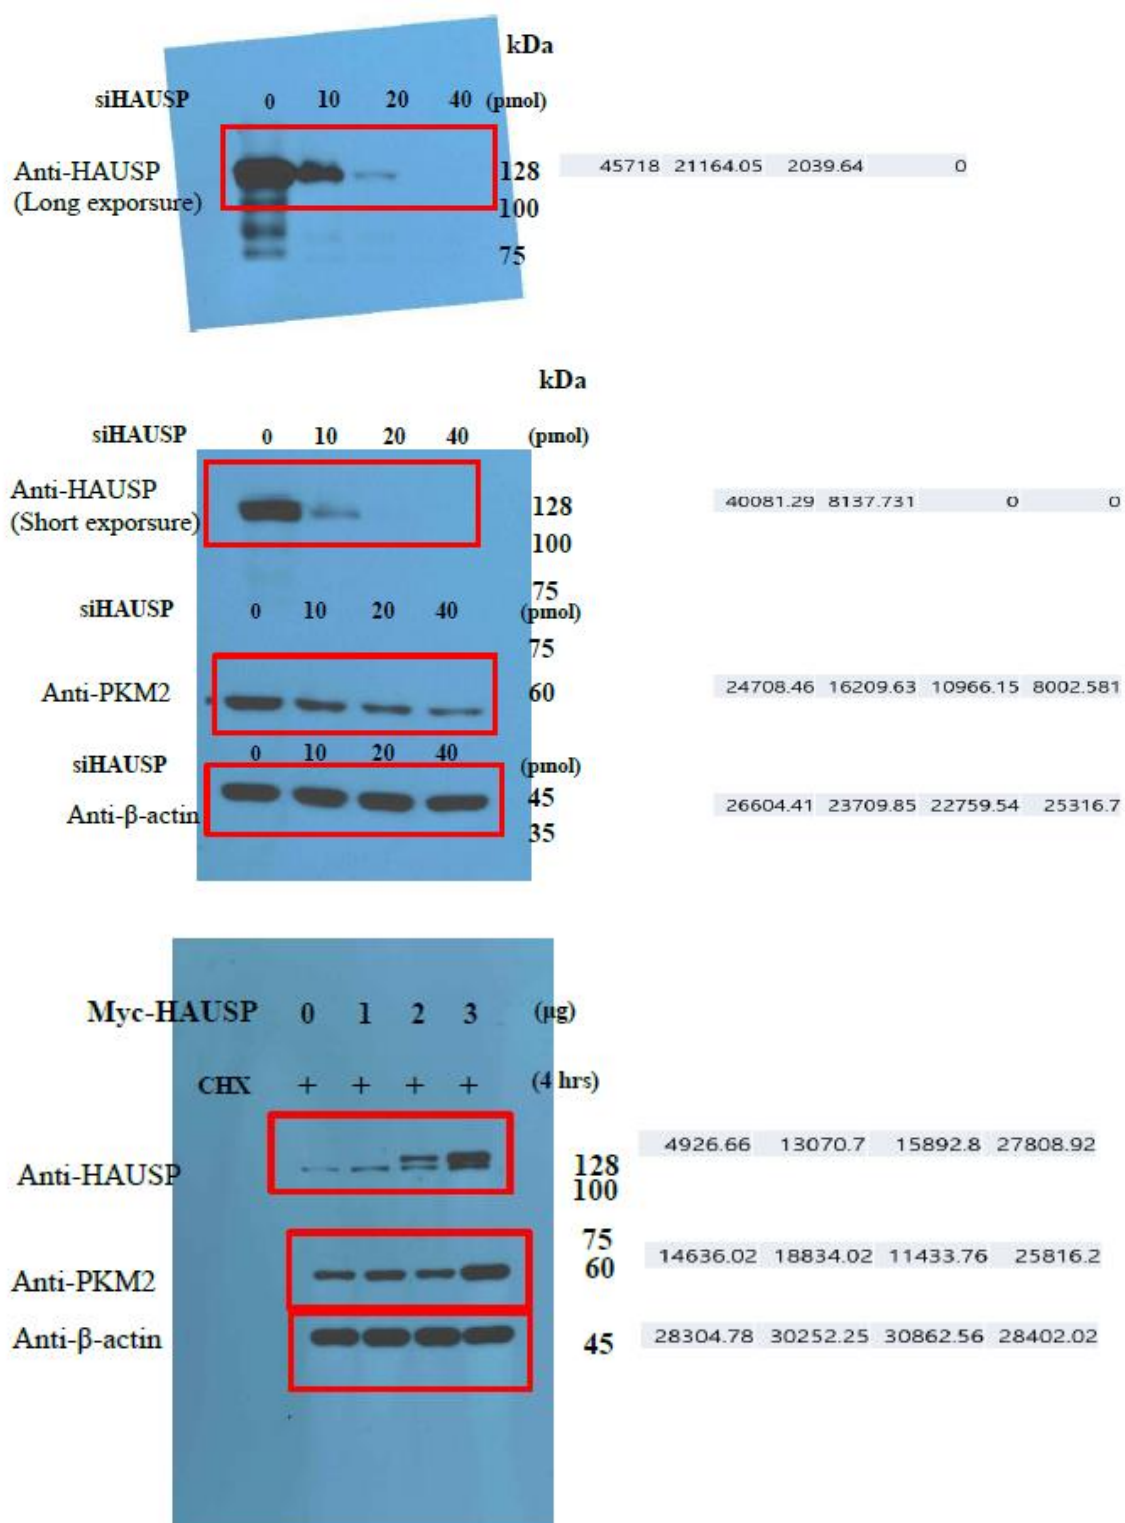

Figure S3. Detailed information about western blot in Figure 3.

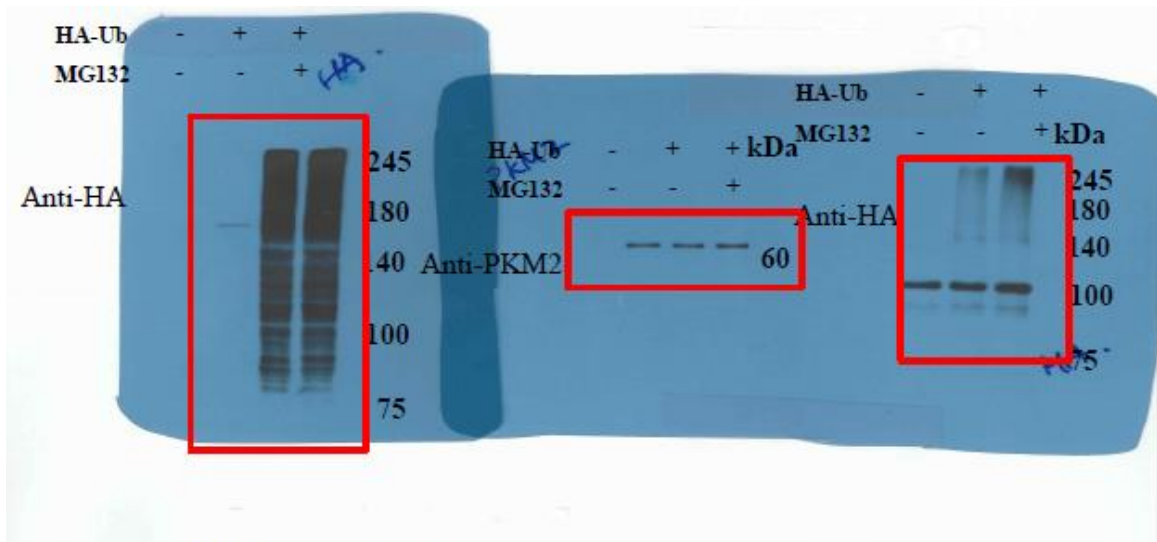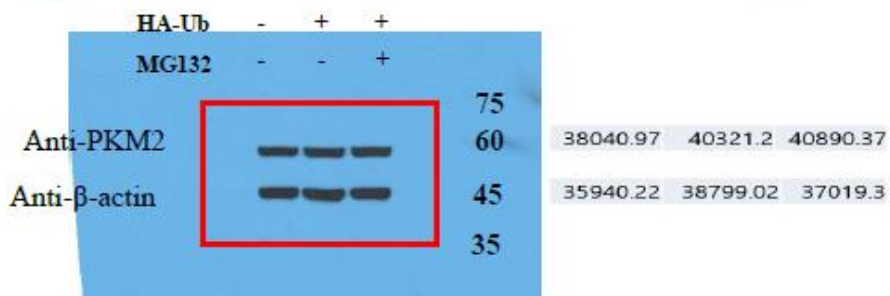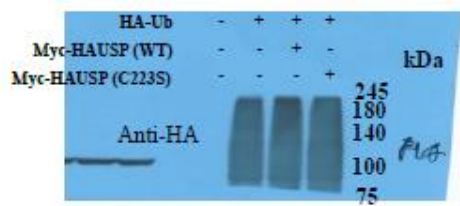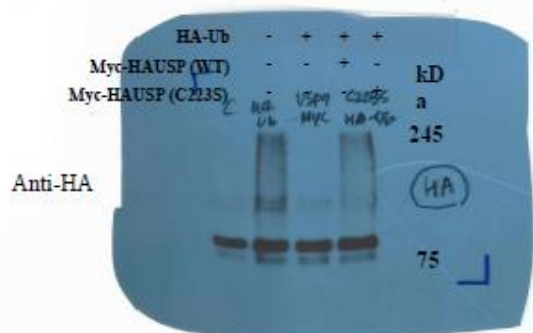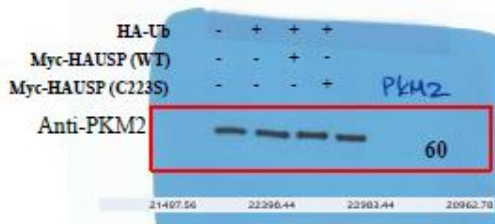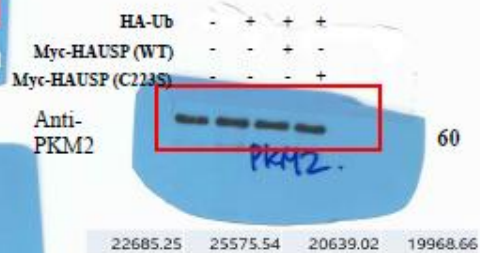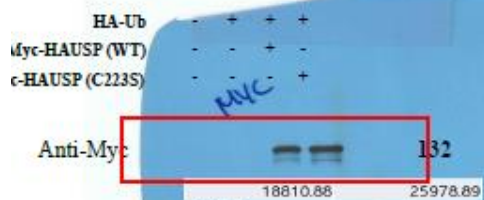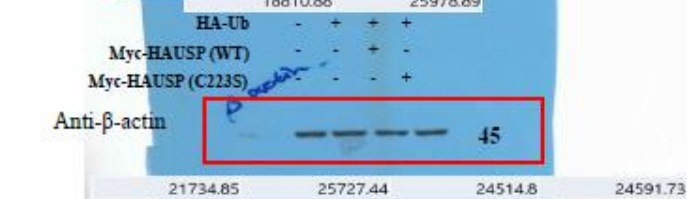

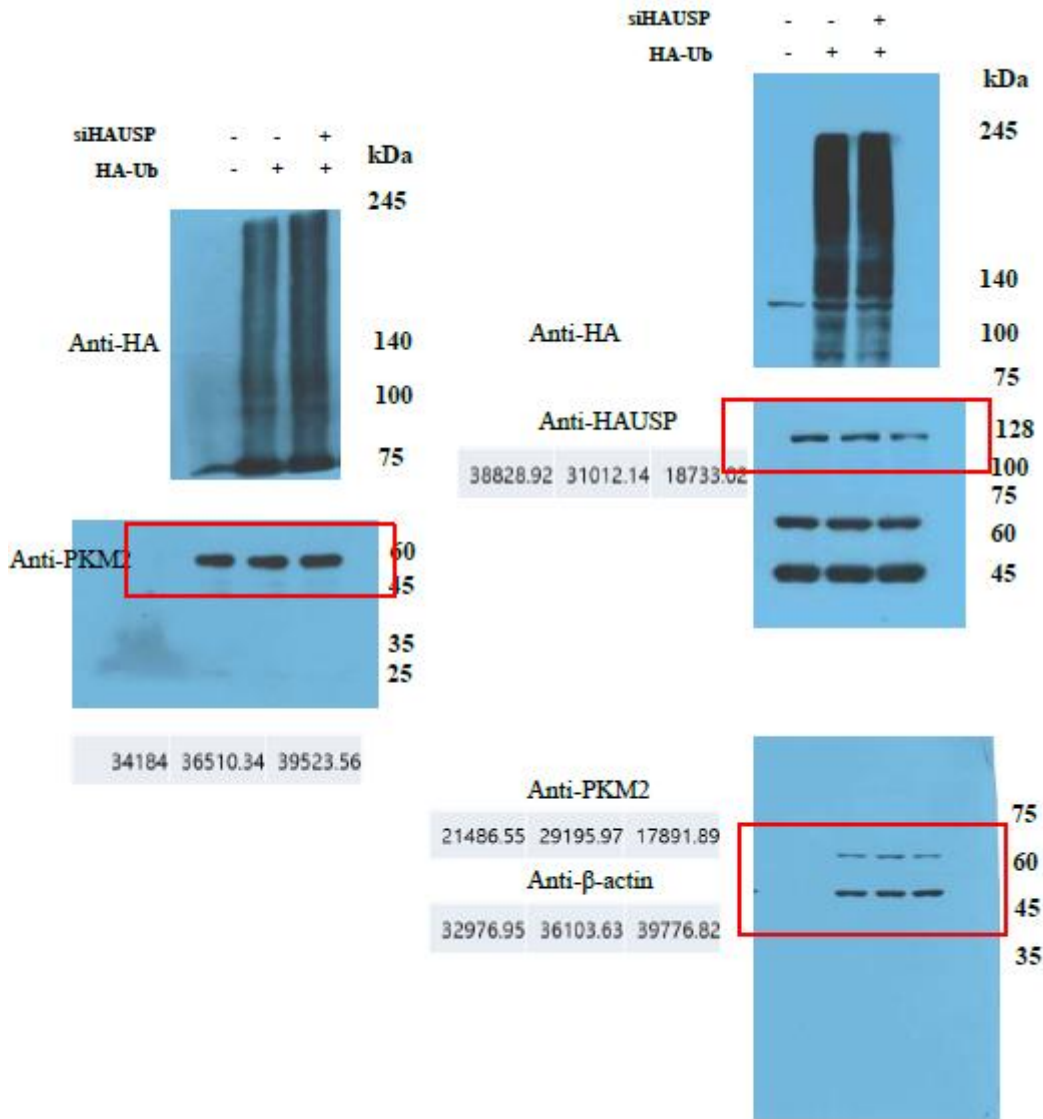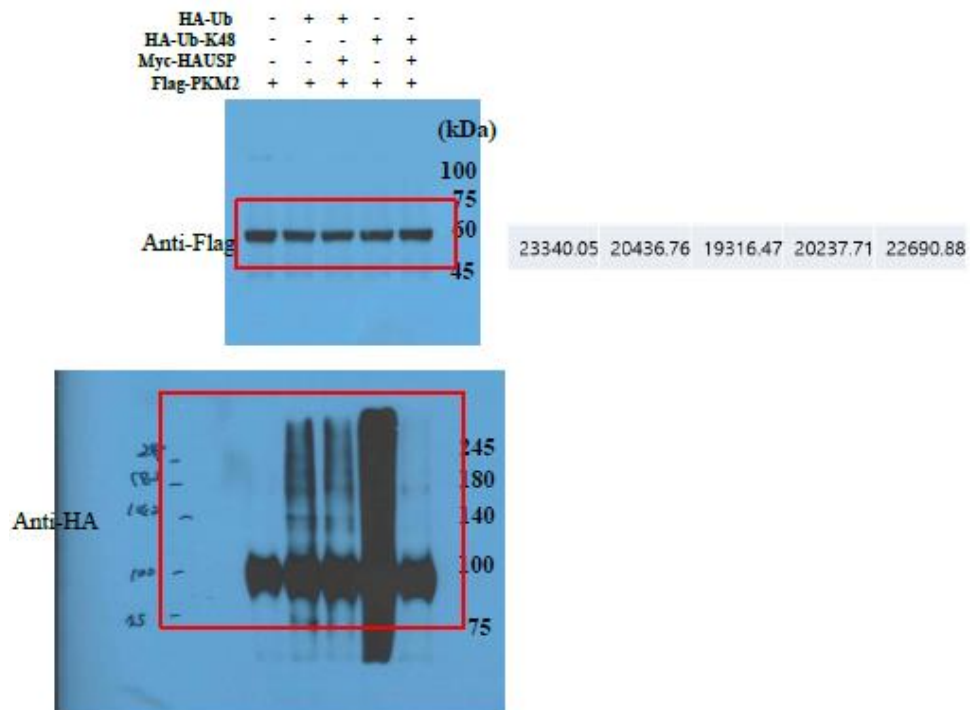



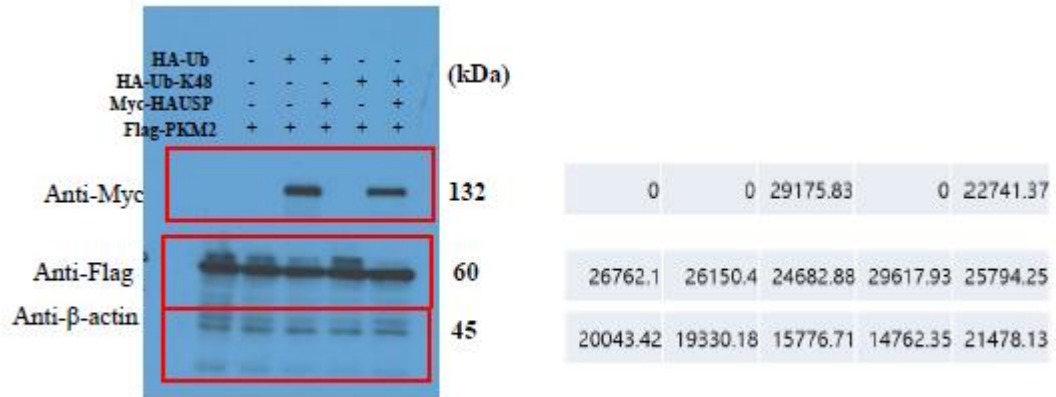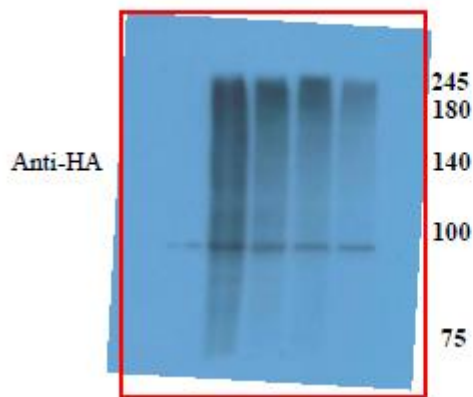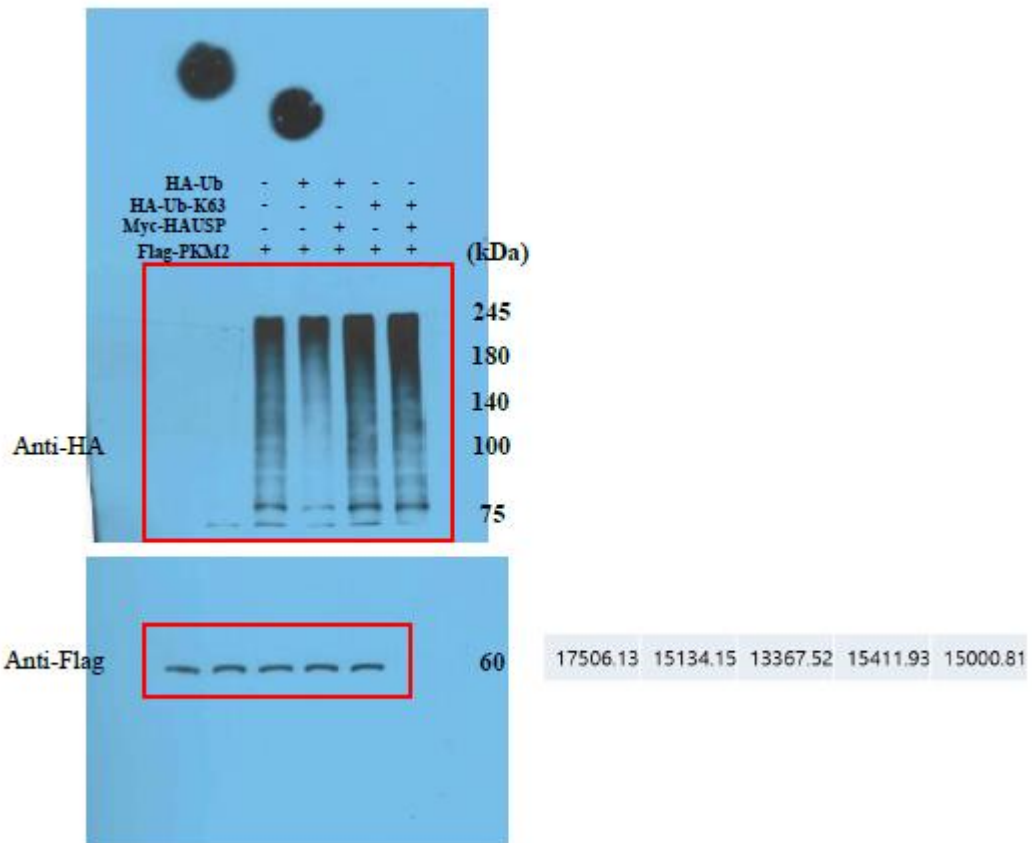

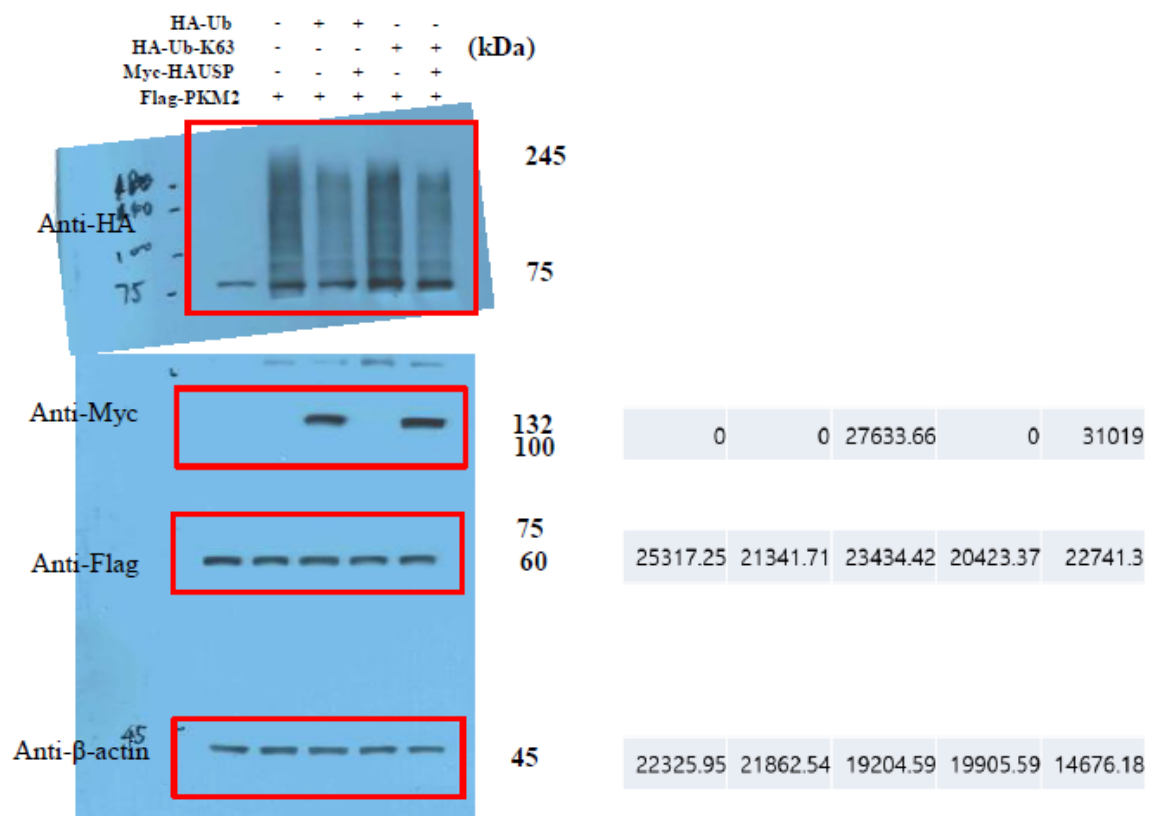

**Figure S4.** Detailed information about western blot in Figure 4.

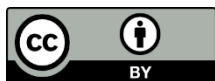

© 2020 by the authors. Licensee MDPI, Basel, Switzerland. This article is an open access article distributed under the terms and conditions of the Creative Commons Attribution (CC BY) license (<http://creativecommons.org/licenses/by/4.0/>).
